# Supplementary material for: Carbon quantum dots embedded with mesoporous hematite nanospheres as efficient visible light-active photocatalysts
Source: Royal Society of Chemistry journal article supplement (doi:10.1039/c2jm16931b), 2012-01-01
Supplement: c2jm16931b.pdf [file c2jm16931b.pdf]

Electronic supplementary information (ESI) available

# **Carbon Quantum Dots Embedded with Mesoporous Hematite Nanospheres as Efficient Visible Light-active Photocatalysts**

*Byong Yong Yu and Seung-Yeop Kwak\**

Department of Materials Science and Engineering, Seoul National University,  
599 Gwanak-ro, Gwanak-gu, Seoul, Korea

\* To whom correspondence should be addressed. *E-mail:* sykwak@snu.ac.kr.

*Tel:* +82-2-880-8365, *Fax:* +82-2-885-1748

**Table S1.** FWHM values of the main diffraction peaks and the crystallite size for mesoporous hematite with the respective diffraction planes.

| h k l | $2\theta$ (deg.) | $d$ -spacing (nm) | Intensity (a.u.) | FWHM ( $2\theta$ ) | Crystallite size (nm) |
|-------|------------------|-------------------|------------------|--------------------|-----------------------|
| 0 1 2 | 24.10            | 0.36              | 28.1             | 0.34               | 23.63                 |
| 1 0 4 | 33.10            | 0.27              | 100.0            | 0.36               | 22.77                 |
| 1 1 0 | 35.56            | 0.25              | 70.7             | 0.36               | 22.92                 |
| 1 1 3 | 40.80            | 0.22              | 23.2             | 0.36               | 23.29                 |
| 0 2 4 | 49.42            | 0.18              | 34.1             | 0.38               | 22.76                 |
| 1 1 6 | 54.02            | 0.17              | 45.1             | 0.38               | 23.21                 |
| 2 1 4 | 62.40            | 0.15              | 28.4             | 0.38               | 24.17                 |
| 3 0 0 | 63.98            | 0.14              | 25.4             | 0.38               | 24.38                 |

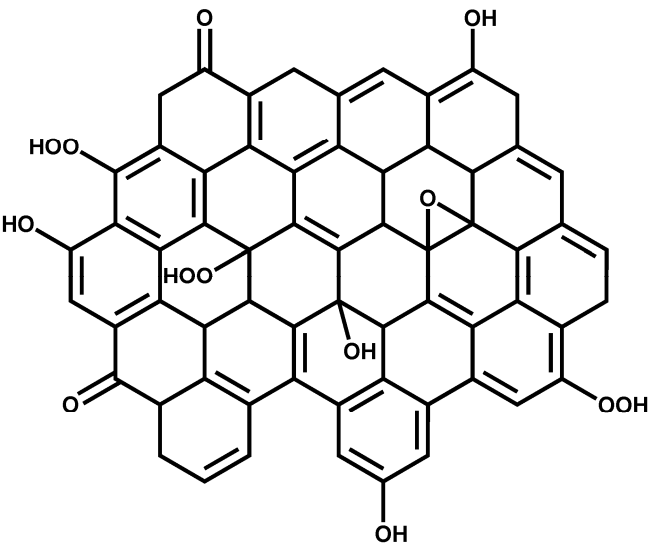

**Fig. S1** Chemical structure of CQD.

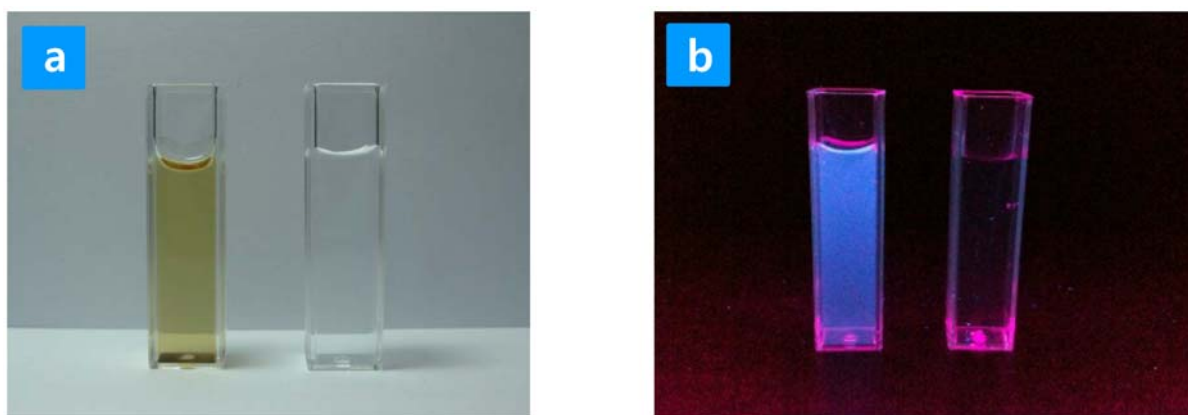

**Fig. S2** CQDs optical image in water illuminated under (a) white (left; CQDs in water, right; water) and (b) UV light (left; CQDs in water, right; water).

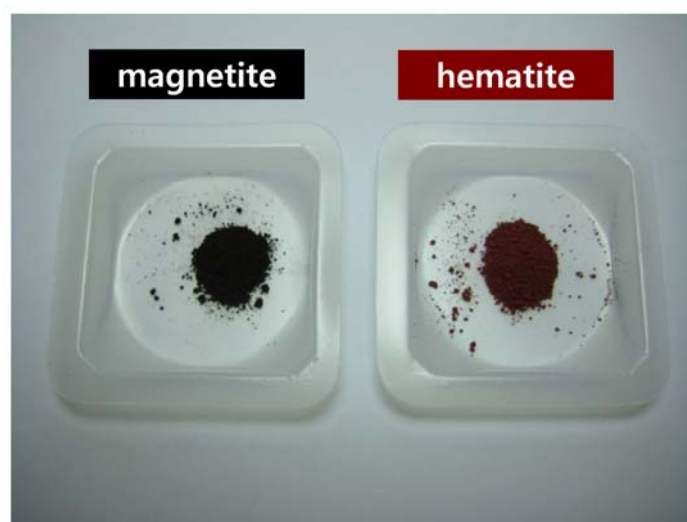

**Fig. S3** Photograph of mesoporous magnetite and hematite powders.

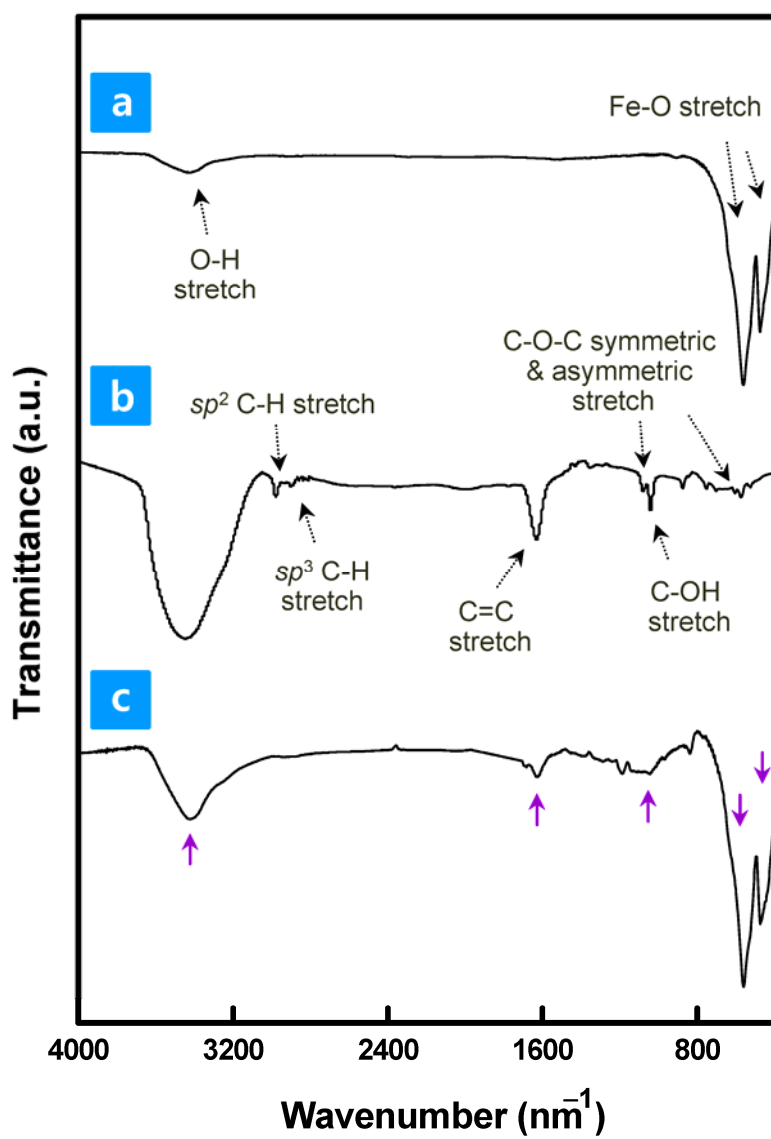

**Fig. S4** FT-IR spectrum of (a) MH, (b) CQD, and (c) CQD/MH.

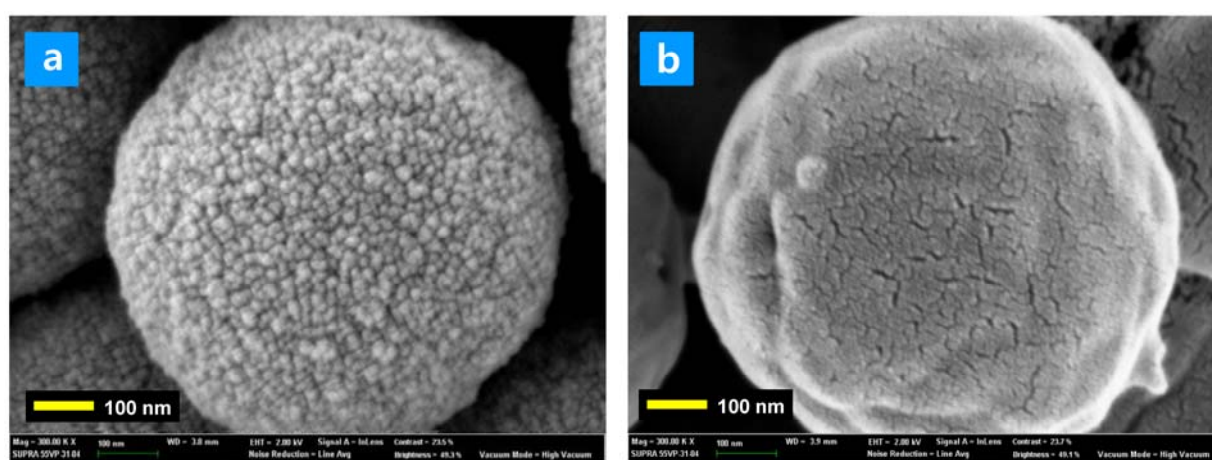

**Fig. S5** FE-SEM images of (a) MH, and (b) CQD/MH (a more detailed view).

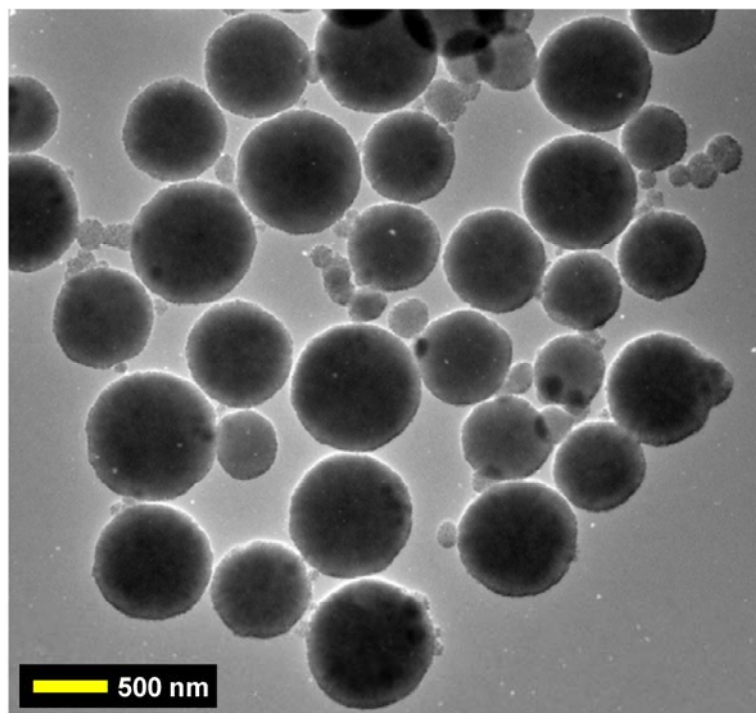

**Fig. S6** TEM images of CQD/MH hybrid clusters.



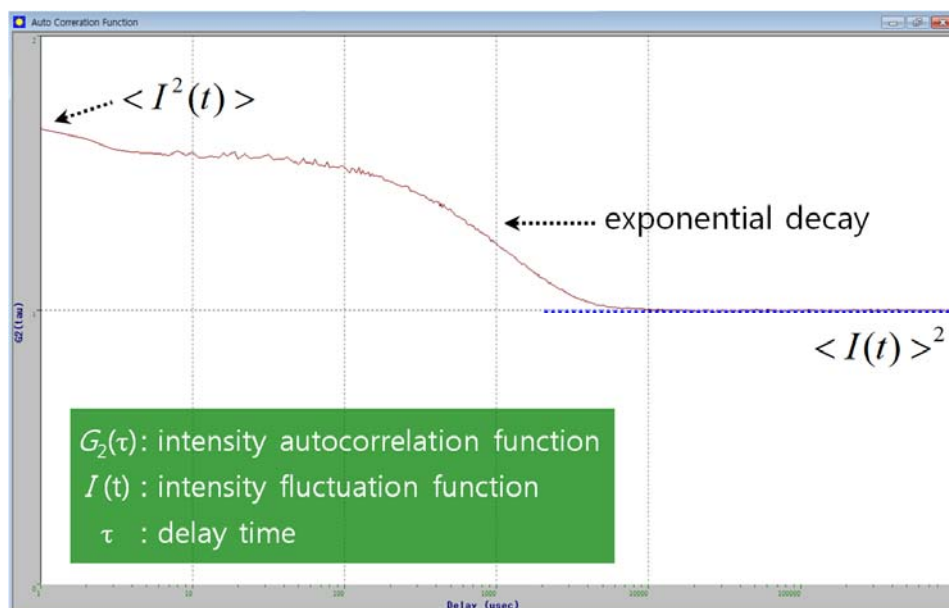

**Fig. S7** The intensity auto-correlation function (ACF),  $G_2(\tau)$  for CQD/MH sample in DLS.

The second-order correlation function  $G_2(\tau)$  can be expressed as a function of the first-order correlation function  $G_1(\tau)$  according to the Siegert relation:  $G_2(\tau) = B(1 + \beta G_1(\tau)^2)$ , where  $B$  is the baseline constant and  $\beta$  is a coherence constant. In the case of a perfect setup, both equal unity. In the case of single-exponential decay,  $G_1(\tau)$  can be expressed in terms of a typical decay rate  $\Gamma$  and time  $t$ ;  $G_1(\tau) = \exp(-\Gamma\tau)$ . The apparent translational diffusion coefficient,  $D$ , is given by equation:  $\Gamma = Dq^2$ , where  $q$  is the magnitude of the scattering vector  $q = 4\pi n \sin(\theta/2)/\lambda$ , where  $n$  is the refractive index of the solvent,  $\theta$  is the scattering angle, and  $\lambda$  is the wavelength of the incident light. For spherical particles, the translational diffusion coefficient can be related to the hydrodynamic radius,  $R$ , according to the Stokes-Einstein equation:  $D = k_B T / 6\pi\eta R$ , where  $D$  is the diffusion coefficient of the Brownian motion of spherical particles,  $k_B$  is the Boltzmann constant,  $T$  is the absolute temperature, and  $\eta$  is the viscosity of the solvent. The hydrodynamic radius distribution of

particles,  $G(R)$  was estimated using the COTIN algorithm, which is conventionally used to determine the inverse Laplace transform of the measured amplitude autocorrelation function.<sup>1, 2</sup>

- (1) R. Finsy, *Adv. Colloid Interfac.* 1994, **52**, 79.
- (2) I. K. Voets, A. De Keizer, M. A. Cohen Stuart and P. De Waard, *Macromolecules* 2006, **39**, 5952.

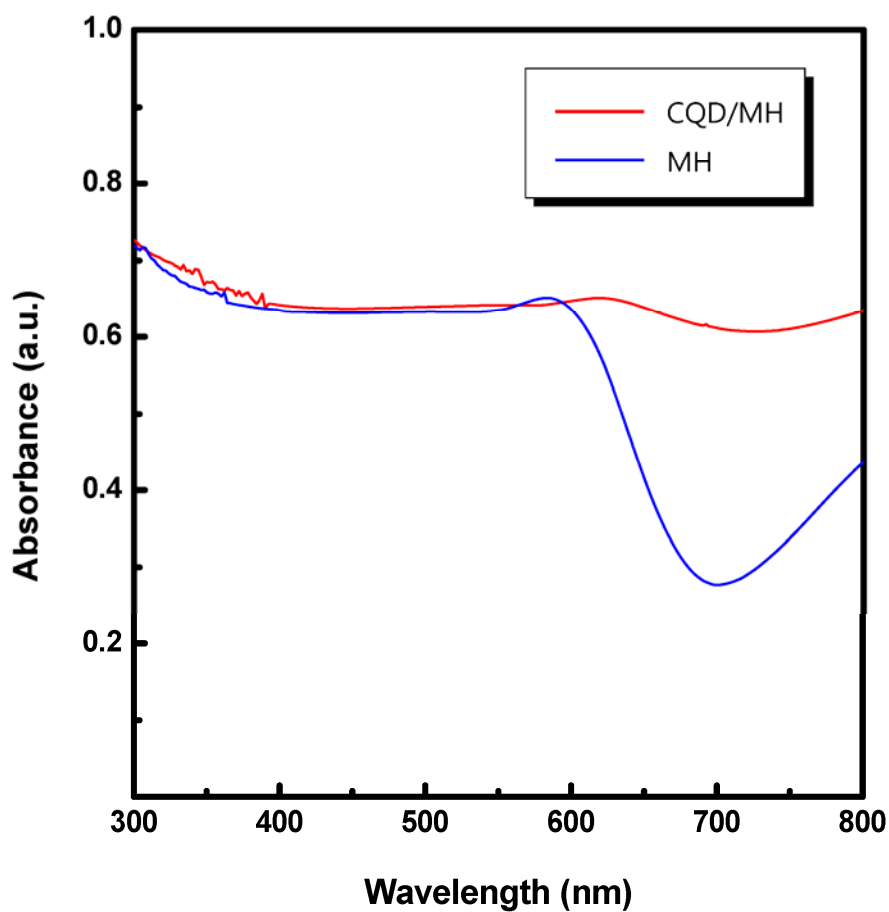

**Fig. S8** UV-visible spectra of the MH and CQD/MH.

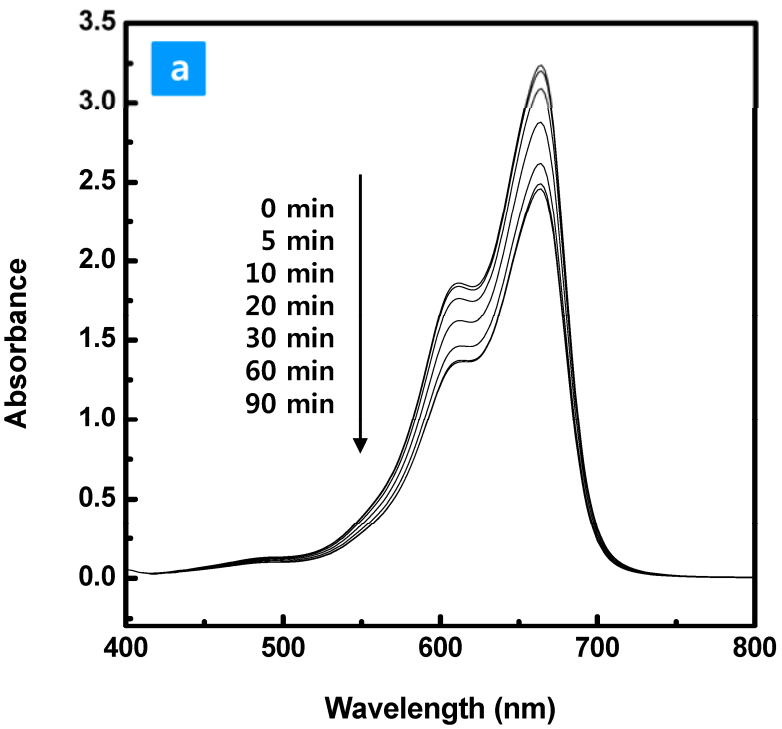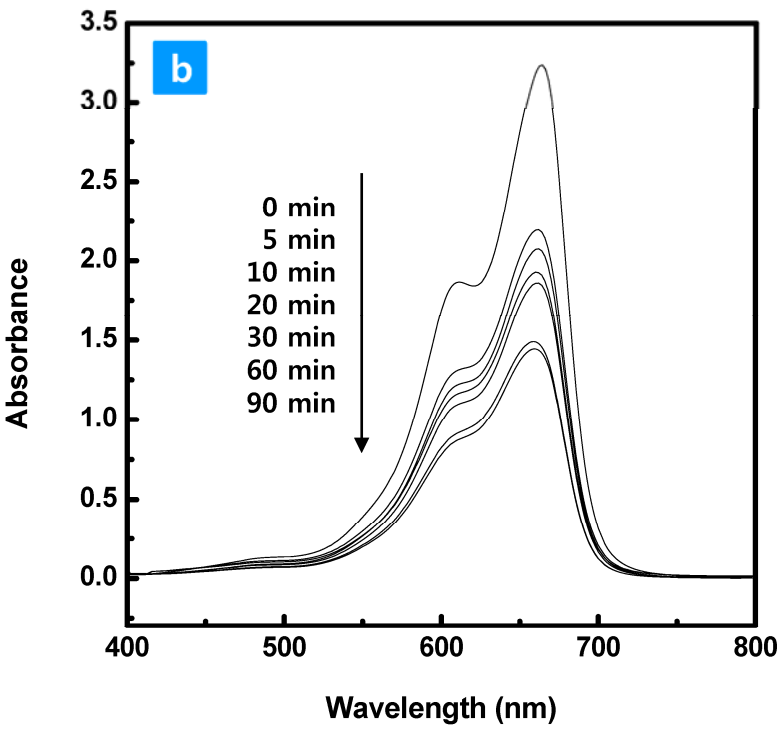

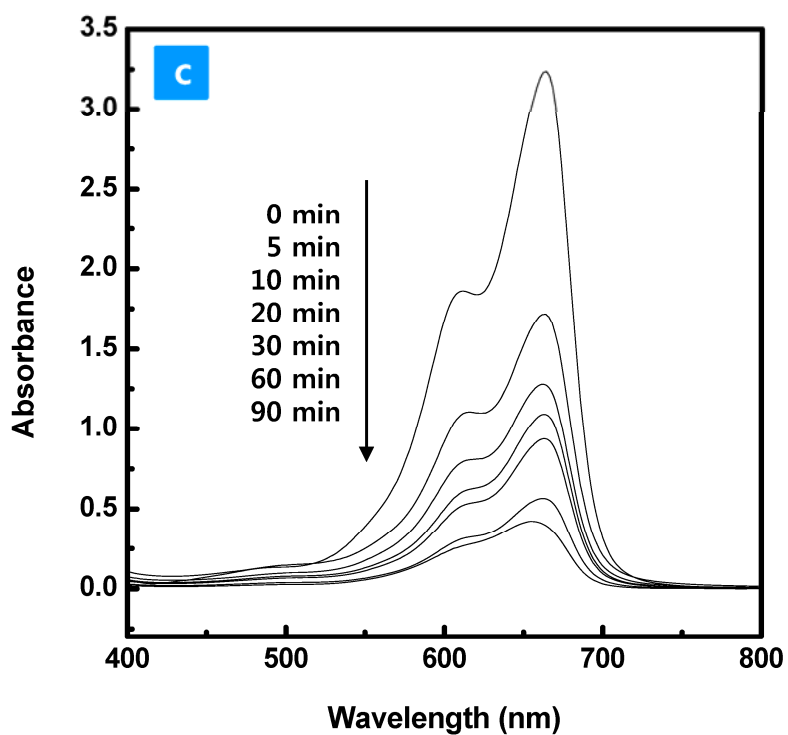

**Fig. S9** Absorption spectra of MB solution taken at different photocatalytic degradation times using (a) MH, (b) MH+H<sub>2</sub>O<sub>2</sub> and (c) CQD/MH.

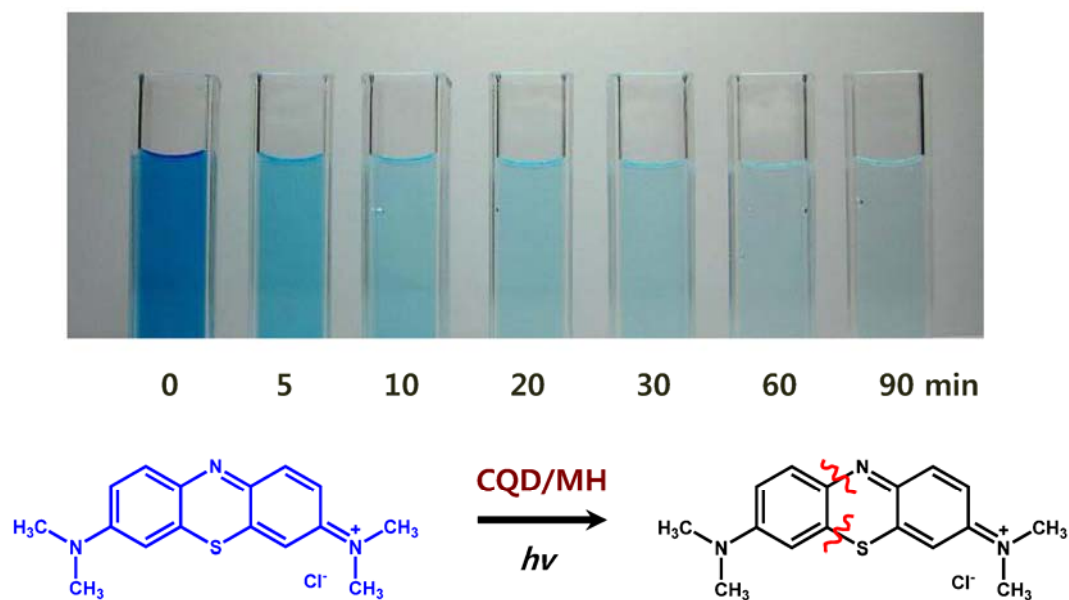

**Fig. S10** Decolorization profiles of MB aqueous solution with visible light irradiation in the presence of the CQD/MH+H<sub>2</sub>O<sub>2</sub>.

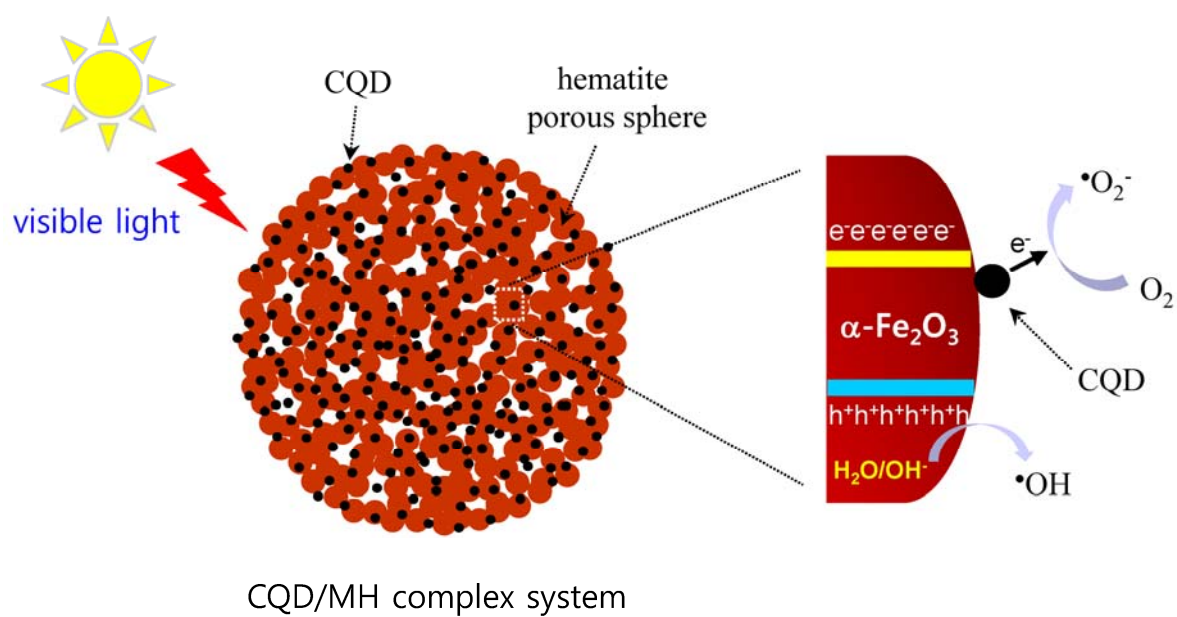

**Fig. S11** Schematic illustration of possible catalytic mechanism for CQD/MH under visible light.
